# Supplementary material
Source: Springer Nature journal article supplement (https://www.springermedizin.de/resource/supplementary/12889_2009_2273_MOESM1_ESM.pdf/9485216)
Supplement: MOESM1 [file 9485216]

**427 clients attended the health facilities**

**76.1% (325/427) not initiated by Service providers  
Missed opp-1**

**Asked willingness during interview**

**80.0% (260/325) became willing  
60.9% (260/427) Missed opp-2**

**HIV test made by counselors**

**43% (112/260) actually tested  
26.2% (112/427) Missed opp-3**

**HIV +ve test result found by counselors**

**13.5% (15/112) were HIV positive  
3.5% (15/427) Missed opp-4**

**23.9% (102/427) initiated by Service providers**

**Asked willingness by service providers**

**71.5% (73/102) became willing  
17% (73/427)**

**HIV test made by service providers**

**60.2% (44/73) tested  
10.3% (44/427) used the opportunities of testing**

**HIV +ve diagnosed by service providers**

**31.8% (14/44) were HIV positive  
3.2% (14/427) used the opportunities of diagnosis**
